# Supplementary material for: Results from Phase I Extension Study Assessing Pexidartinib Treatment in Six Cohorts with Solid Tumors including TGCT, and Abnormal CSF1 Transcripts in TGCT
Source: PubMed Central journal article supplement — Clin Cancer Res. 2021 Oct 29;28(2):298–307. doi: 10.1158/1078-0432.CCR-21-2007 (PMC9401544; doi:10.1158/1078-0432.ccr-21-2007), 2021-10-29
Supplement: ccr-21-2007_supp1.pdf [file ccr-21-2007_supp1.pdf]

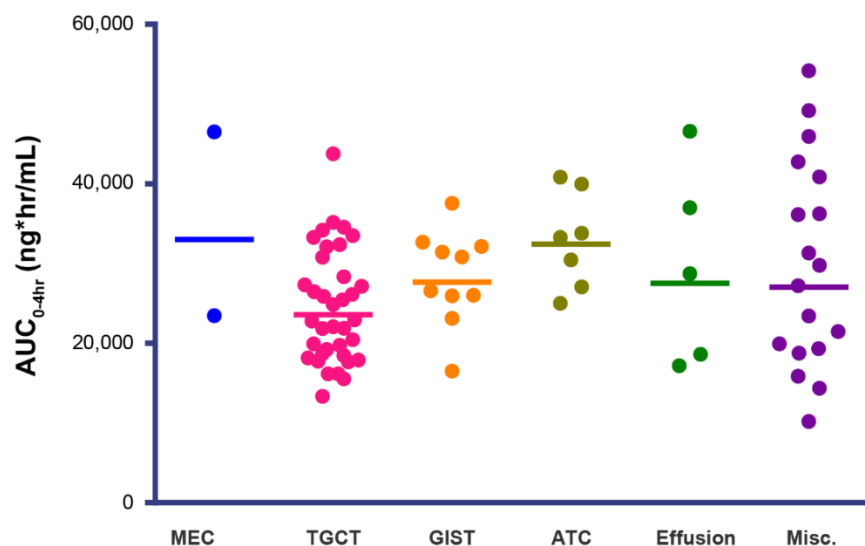

**Fig. S1.**

**Steady state plasma exposure of pexidartinib in patients receiving 1000 mg daily on a BID (uneven split dose) regimen.**

Depicted are the AUC<sub>0-4hr</sub> available for 78 patients from 5 disease-specific cohorts (2 MECs, 36 TGCTs, 10 GISTs, 7 ATCs, and 5 malignant effusions) and 1 miscellaneous tumor cohort (18). The horizontal bar indicates the geometric mean AUC<sub>0-4hr</sub> for each cohort. The geometric mean AUC<sub>0-4hr</sub> for all 78 patients is 26,052 ng·hr/mL (range 10,201 ng·hr/mL to 54,206 ng·hr/mL). The geometric mean AUC<sub>0-4hr</sub> for the 36 patients with TGCT is slightly lower, 23,581 ng·hr/mL (range, 13,374 ng·hr/mL to 43,778 ng·hr/mL), but the difference is not statistically significant.

ATC = anaplastic thyroid carcinoma; AUC = area under the curve; BID = twice per day; GIST = gastrointestinal stromal tumor; MEC = mucoepidermal carcinoma; TGCT = tenosynovial giant cell tumor.
