# Supplementary material for: Results from Phase I Extension Study Assessing Pexidartinib Treatment in Six Cohorts with Solid Tumors including TGCT, and Abnormal CSF1 Transcripts in TGCT
Source: PubMed Central journal article supplement — Clin Cancer Res. 2021 Oct 29;28(2):298–307. doi: 10.1158/1078-0432.CCR-21-2007 (PMC9401544; doi:10.1158/1078-0432.ccr-21-2007), 2021-10-29
Supplement: ccr-21-2007_supp2.pdf [file ccr-21-2007_supp2.pdf]

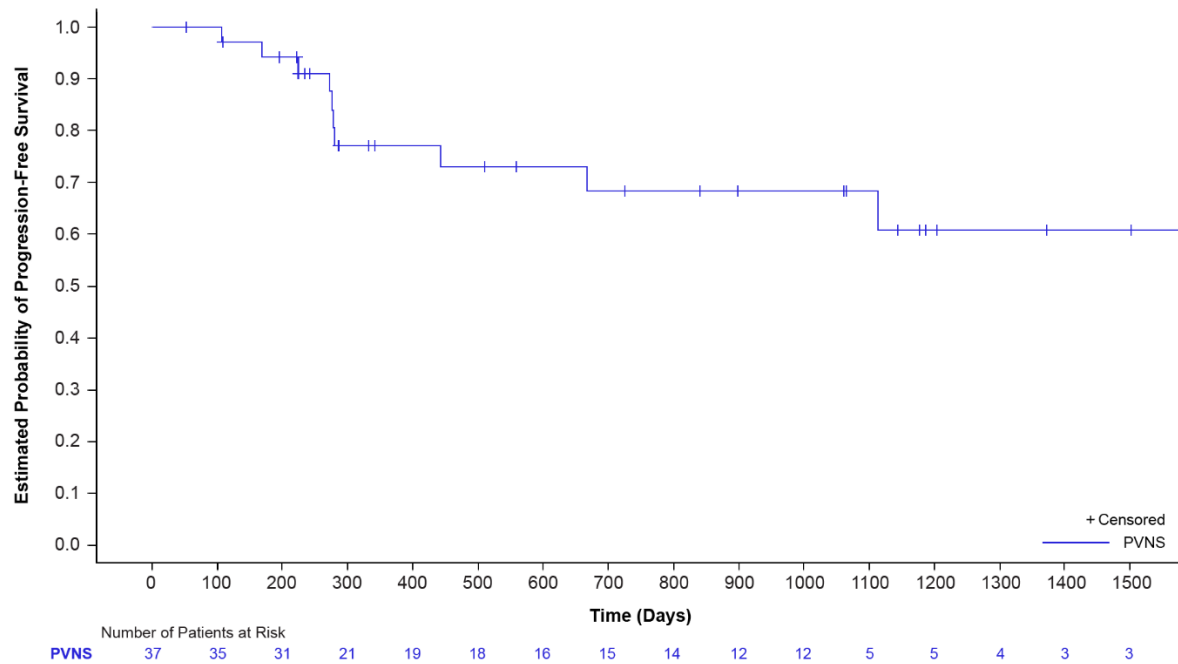

**Fig. S2.**

**Progression-free survival – patients with TGCT.**

Efficacy-evaluable population. Progression-free survival was defined as the number of days from the first day of treatment to the first documented disease progression or date of death, whichever occurred first. If no disease progression or death was documented prior to study termination, analysis cutoff, or the start of confounding anticancer therapy, progression-free survival was censored at the date of last evaluable tumor assessment.

PVNS = pigmented villonodular synovitis; TGCT = tenosynovial giant cell tumor.
