# Supplementary material for: Results from Phase I Extension Study Assessing Pexidartinib Treatment in Six Cohorts with Solid Tumors including TGCT, and Abnormal CSF1 Transcripts in TGCT
Source: PubMed Central journal article supplement — Clin Cancer Res. 2021 Oct 29;28(2):298–307. doi: 10.1158/1078-0432.CCR-21-2007 (PMC9401544; doi:10.1158/1078-0432.ccr-21-2007), 2021-10-29
Supplement: ccr-21-2007_supp4.pdf [file ccr-21-2007_supp4.pdf]

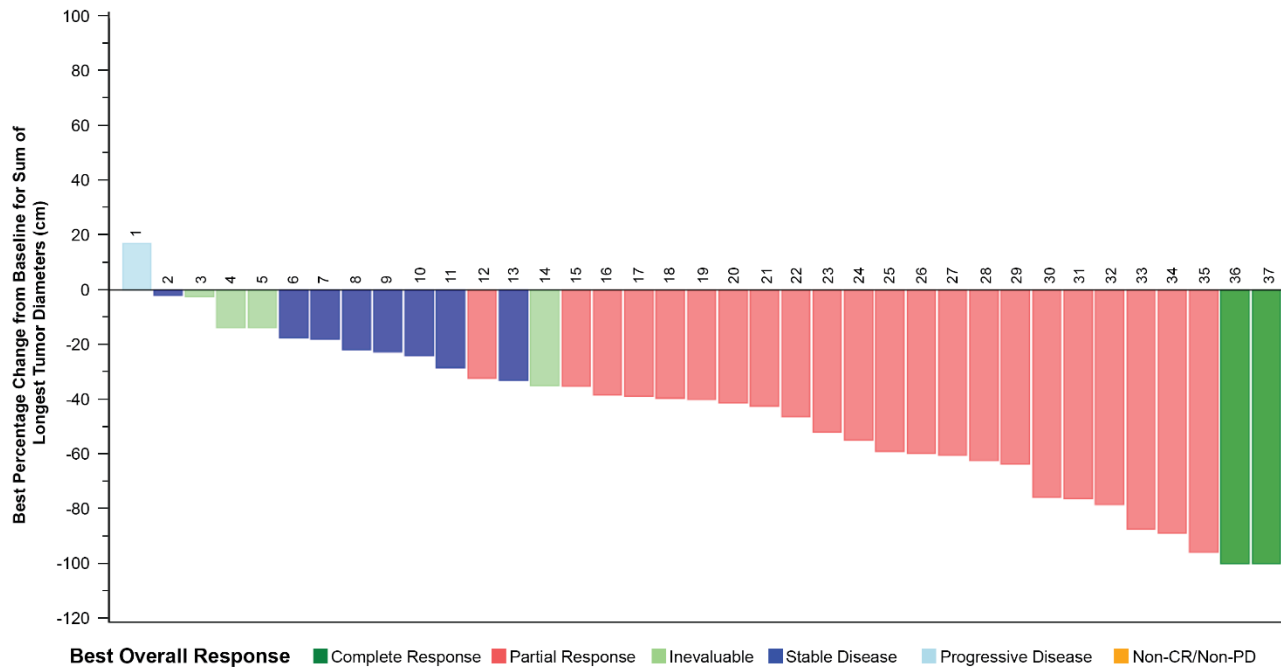

Note: Each bar represents one patient in the study

**Fig. S4.**  
**Waterfall plot for best change for target lesions by patient based on percent change from baseline for sum of longest tumor diameters – TGCT cohort.**  
 Efficacy-evaluable population.

CR = complete response; PD = progressive disease; TGCT = tenosynovial giant cell tumor.
