# Supplementary material for: Results from Phase I Extension Study Assessing Pexidartinib Treatment in Six Cohorts with Solid Tumors including TGCT, and Abnormal CSF1 Transcripts in TGCT
Source: PubMed Central journal article supplement — Clin Cancer Res. 2021 Oct 29;28(2):298–307. doi: 10.1158/1078-0432.CCR-21-2007 (PMC9401544; doi:10.1158/1078-0432.ccr-21-2007), 2021-10-29
Supplement: ccr-21-2007_supp5.pdf [file ccr-21-2007_supp5.pdf]

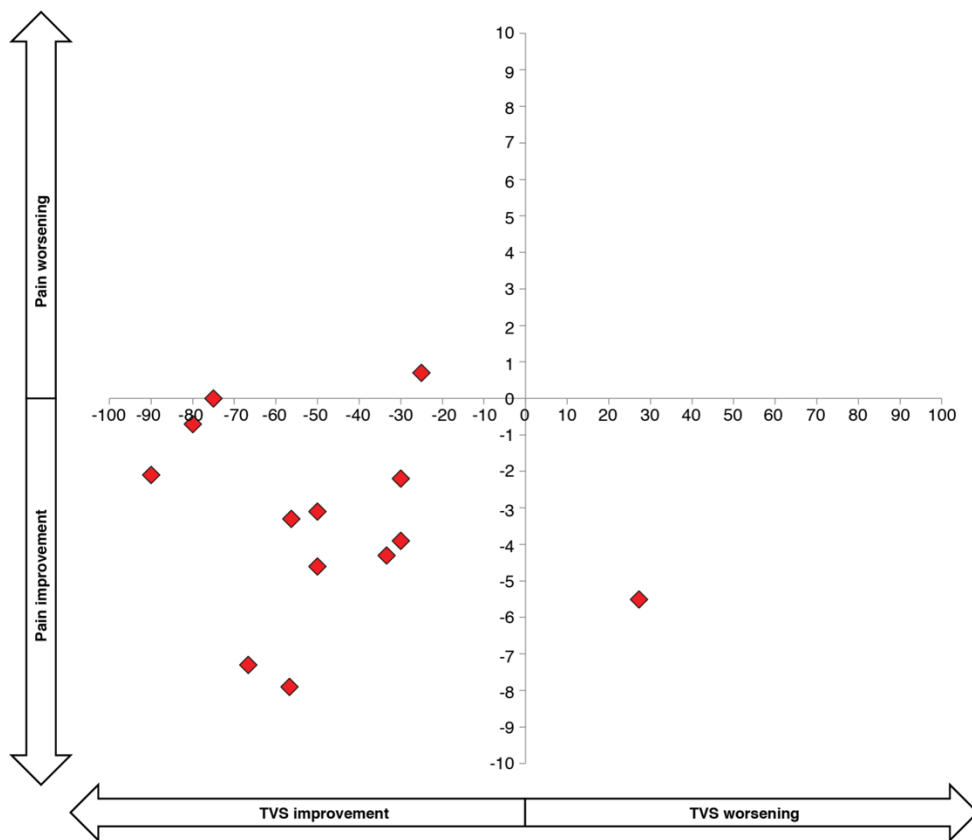

**Fig. S5.**

**Scatter plot of TVS percentage change against BPI NRS Worst Pain change.**

n = 13; BPI measurements were assessed toward the end of patient enrollment. Some patients were excluded from imaging because of metallic artifacts.

NRS = numeric rating scale; BPI = Brief Pain Inventory; TVS = tumor volume score.
